# Supplementary material for: Cd2SnO4 transparent conductive oxide: a promising alternative candidate for highly efficient hybrid halide perovskite solar cells
Source: Royal Society of Chemistry journal article supplement (doi:10.1039/c6ra27146d), 2017-01-01
Supplement: c6ra27146d1.pdf [file c6ra27146d1.pdf]

## Electronic supplementary information

### **Cd<sub>2</sub>SnO<sub>4</sub> Transparent Conductive Oxide: A Promising Alternative Candidate for Highly Efficient Hybrid Halide Perovskite Solar Cells**

Dong Liu,<sup>a, #</sup> Shengqiang Ren,<sup>a, #</sup> Xiao Ma,<sup>a</sup> Cai Liu,<sup>a</sup> Lili Wu,<sup>\*a</sup> Wei Li,<sup>a</sup> Jingquan Zhang,<sup>\*a</sup> and  
Lianghuan Feng<sup>a</sup>

<sup>a</sup>Institute of Solar Energy Materials and Devices, College of Materials Science and  
Engineering, Sichuan University, Chengdu, China, 610064.

**\*Corresponding author:**

**Tel/Fax:** +86 (0)28 85412542.

**E-mail:** zhangjq@scu.edu.cn;

**TableS1.** Detailed energy band parameters of the TiO<sub>2</sub> and Cd<sub>2</sub>SnO<sub>4</sub> films.

| Sample                           | Work Function<br>$\Phi$ (eV) | $E_{Fermi}-E_{VBM}$<br>(eV) | Band Gap<br>$E_g$ (eV) | Electron<br>affinity $\chi$<br>(eV) |
|----------------------------------|------------------------------|-----------------------------|------------------------|-------------------------------------|
| Cd <sub>2</sub> SnO <sub>4</sub> | 4.2                          | 3.03                        | 3.05                   | 4.18                                |
| TiO <sub>2</sub>                 | 4.65                         | 2.65                        | 3.2                    | 4.1                                 |

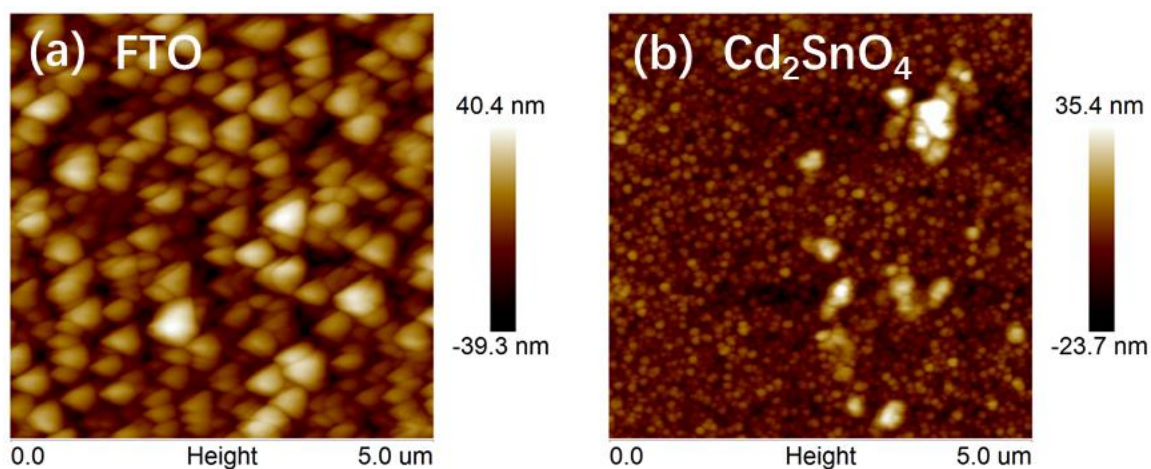

**Fig. S1.** AFM images of (a) FTO and (b) Cd<sub>2</sub>SnO<sub>4</sub> substrates.

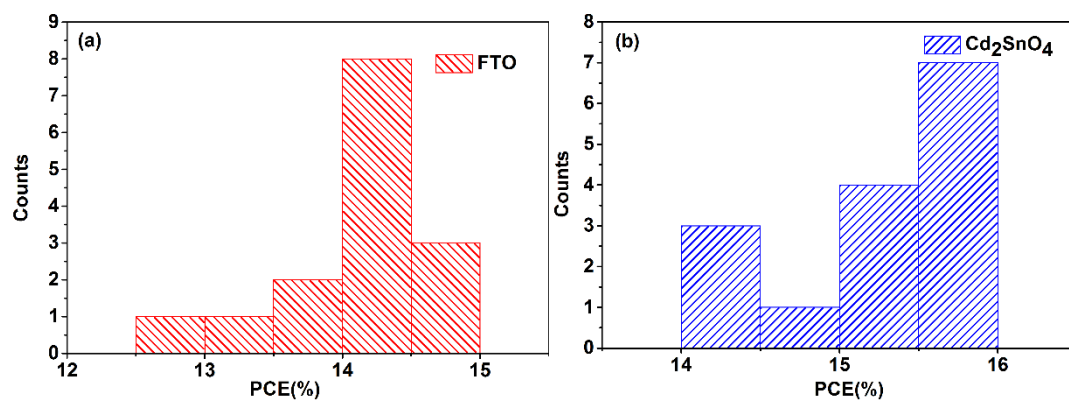

**Fig. S2.** Histograms of (a) FTO-based and (b) Cd<sub>2</sub>SnO<sub>4</sub>-based devices efficiency for 15 cells of each group.

**TableS2** Values for PL decay time of perovskite films on FTO/TiO<sub>2</sub> and Cd<sub>2</sub>SnO<sub>4</sub>/TiO<sub>2</sub> substrates.

| Substrate                                          | $\tau_1$ (ns) | Fraction | $\tau_2$ (ns) | Fraction |
|----------------------------------------------------|---------------|----------|---------------|----------|
| FTO/TiO <sub>2</sub>                               | 0.55          | 67.7%    | 14.44         | 32.3%    |
| Cd <sub>2</sub> SnO <sub>4</sub> /TiO <sub>2</sub> | 0.46          | 89.6%    | 9.26          | 10.4%    |

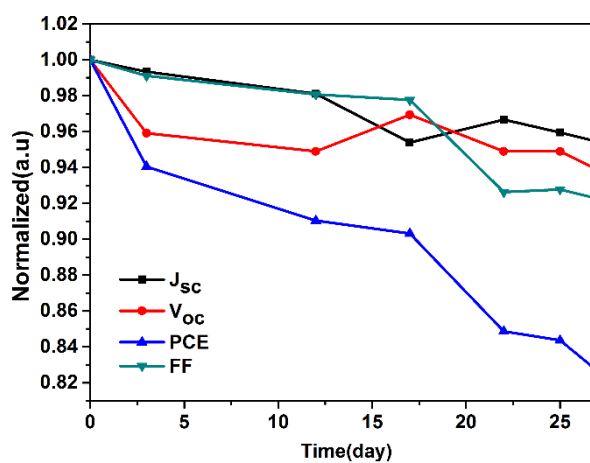

**Fig. S3.** Stability of FTO-based device stored in relative humidity of ~10% for 27 days.
